# Supplementary material for: An easy and efficient inducible CRISPR/Cas9 platform with improved specificity for multiple gene targeting
Source: PubMed Central journal article supplement (PMC5100567; doi:10.1093/nar/gkw660), 2016-07-25
Supplement: supp_gkw660_nar-01425-met-h-2016-File006.pdf [file supp_gkw660_nar-01425-met-h-2016-File006.pdf]

**Supplementary data**  
for  
**An easy and efficient inducible CRISPR/Cas9 platform with improved specificity  
for multiple gene targeting**

Jian Cao<sup>1</sup>, Lizhen Wu<sup>1</sup>, Shang-Min Zhang<sup>1</sup>, Min Lu<sup>1,2</sup>, William K.C. Cheung<sup>1</sup>, Wesley Cai<sup>1</sup>, Molly Gale<sup>1</sup>, Qi  
Xu<sup>1,3</sup>, and Qin Yan<sup>1\*</sup>

<sup>1</sup>Department of Pathology, Yale School of Medicine, New Haven, CT.

<sup>2</sup>Harbin Institute of Technology, Harbin, China

<sup>3</sup>Department of Oncology, Renji Hospital, Shanghai Jiao Tong University School of Medicine, Shanghai, China

\*To whom correspondence should be addressed: Tel: +1-203-785-6672; Fax: +1-203-785-2443; Email: [qin.yan@yale.edu](mailto:qin.yan@yale.edu)

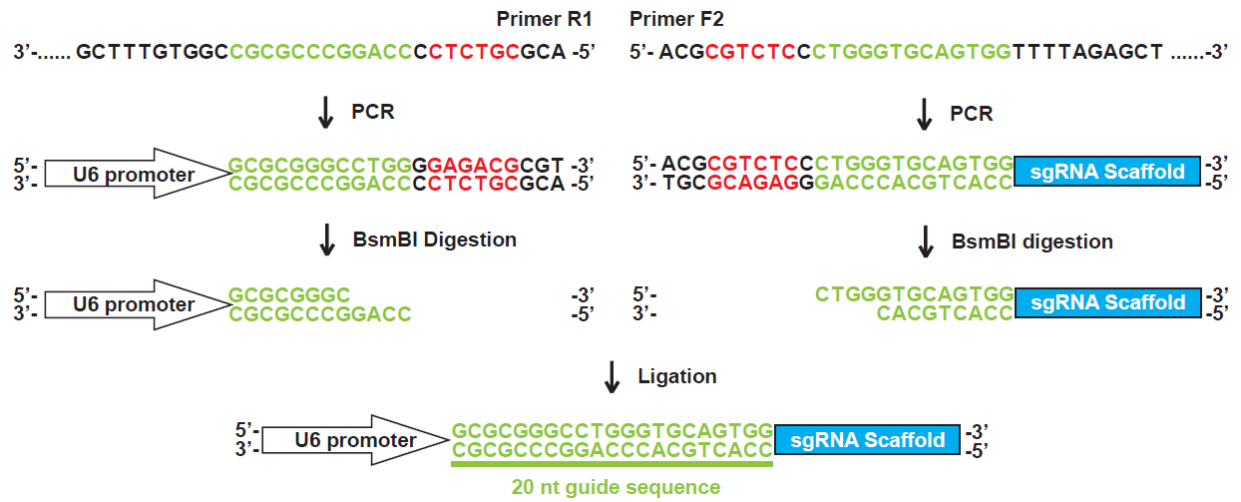

**Figure S1.** An example of assembly of guide sequence from two primers.

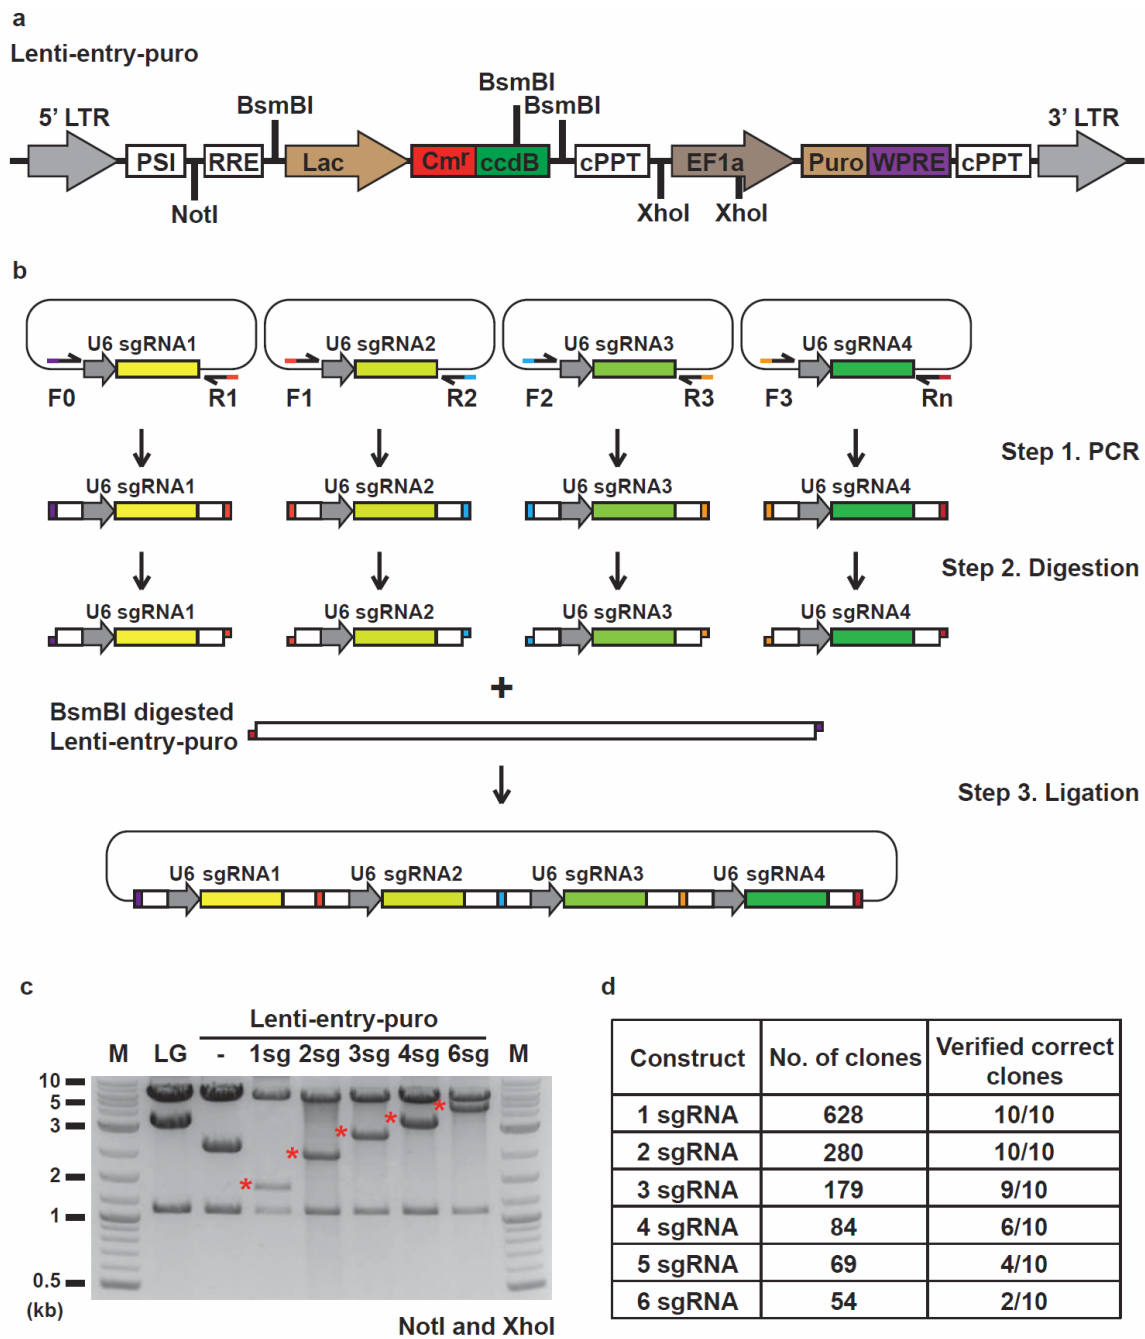

**Figure S2.** A one-step method to generate a multiple sgRNA delivery plasmid using sgRNA delivery plasmid as the template. (a) Schematic representation of the Lenti-entry-puro plasmid. LTR, long terminal repeat; PSI, retroviral  $\Psi$  packaging element; RRE, Rev response element; Lac, Lac promoter;  $Cm^r$ , Chloramphenicol resistance; *ccdB*, toxin *ccdB* gene; cPPT, central polypurine tract; EF1 $\alpha$ , EF1 $\alpha$  promoter; Puro, puromycin resistance; WPRE, Woodchuck hepatitis virus posttranscriptional regulatory element. (b) Overview of the cloning strategy. (c) NotI and XhoI digestion of indicated plasmids showing correct vector assembly of 1, 2, 3, 4, or 6 sgRNA cassettes. LG, LentiGuide. M, Log-2 DNA ladder (NEB). Fragments carrying sgRNA cassettes are indicated by red stars (\*). (d) A summary of the cloning efficiency for making the constructs with different numbers of sgRNAs. 10 clones were randomly picked and verified by the size of NotI and XhoI digested fragments.

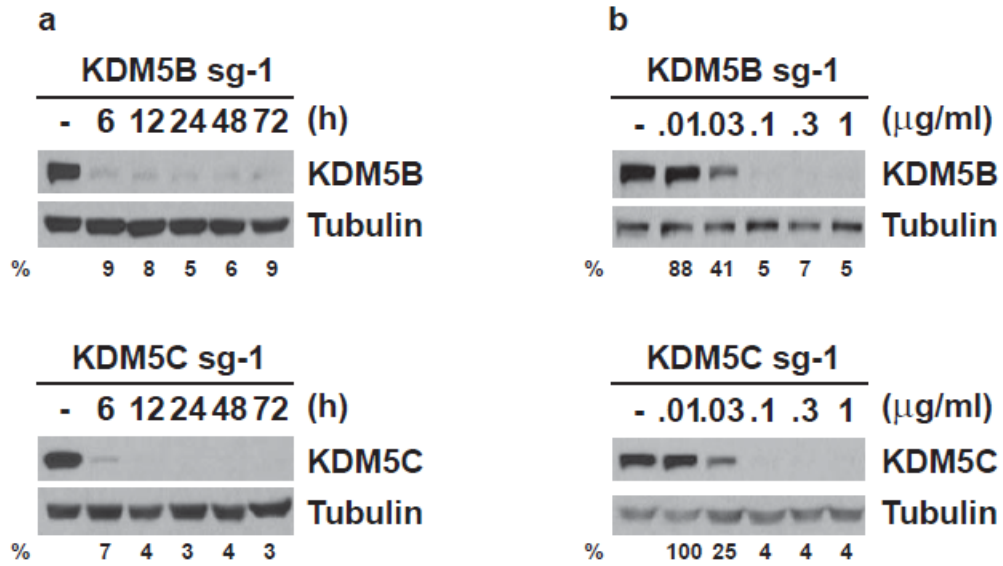

**Figure S3.** Optimization of induction conditions.

(a) HeLa/iCas9-c1 cells were transduced with KDM5B sg-1 or KDM5C sg-1, treated with 1 µg/ml doxycycline for the indicated time, after which doxycycline was withdrawn, and all cells were harvested after 72 hours for western blot analyses. (e) HeLa/iCas9-c1 were cells transduced with KDM5B sg-1 or KDM5C sg-1, treated with the indicated concentration of doxycycline for 48 hours, and harvested for western blot analyses.

**Table S1. Stable inducible Cas9 cell lines.**

| iCas9 cell lines | Parental cell lines                        | Unsorted | Sorted |
|------------------|--------------------------------------------|----------|--------|
| HeLa/iCas9       | Human cervical adenocarcinoma cells        | +        | +      |
| MCF7/iCas9       | Human breast adenocarcinoma cells          | +        | +      |
| SKBR3/iCas9      | Human breast adenocarcinoma cells          | +        | +      |
| BT474/iCas9      | Human breast ductal carcinoma cells        | +        | +      |
| MCF10A/iCas9     | Human immortalized breast epithelial cells | +        | +      |
| PC9/iCas9        | Human lung adenocarcinoma cells            | +        |        |
| NT2/iCas9        | Mouse breast tumor cells                   | +        |        |

**Table S2. Primers used for multiple sgRNA assembly (for Figure 2).** BsmBI recognition sites are highlighted in green. sgRNA sequences (F1 and Rn) and splitted sgRNA sequences (R1 and F2, R2 and F3, R3 and F4, R4 and F5) are highlighted in blue. Overhang sequences are underlined. Overhang sequences for inserting into vectors are highlighted in red.

|    |                                                                                       |
|----|---------------------------------------------------------------------------------------|
| F1 | ACG <u>CGTCTC</u> <u>ACACC</u> <u>GCTGCAAAATTCGGCCGCCCA</u> GTTTTAGAGCTAGAAATAGCAAGTT |
| R1 | ACG <u>CGTCTC</u> <u>CCCAGGCCCGCGC</u> CGGTGTTTCGTCCTTTCCAC                           |
| F2 | ACG <u>CGTCTC</u> <u>CCTGGGTGCAGTG</u> GTTTTAGAGCTAGAAATAGC                           |
| R2 | ACG <u>CGTCTC</u> <u>GAGCCGGGGTCCGAC</u> CGGTGTTTCGTCCTTTCCAC                         |
| F3 | ACG <u>CGTCTC</u> <u>CGGCTCCATGG</u> GTTTTAGAGCTAGAAATAGC                             |
| R3 | ACG <u>CGTCTC</u> <u>TCACCGGAAATC</u> CGGTGTTTCGTCCTTTCCAC                            |
| F4 | ACG <u>CGTCTC</u> <u>GGTGAAGGATGGGG</u> GTTTTAGAGCTAGAAATAGC                          |
| R4 | ACG <u>CGTCTC</u> <u>GCAGACTGGCAT</u> CGGTGTTTCGTCCTTTCCAC                            |
| F5 | ACG <u>CGTCTC</u> <u>GCTGCTCGGCTA</u> GTTTTAGAGCTAGAAATAGC                            |
| Rn | ACG <u>CGTCTC</u> <u>AAAC</u> <u>CCGTTCTACATTGGGAATCT</u> CGGTGTTTCGTCCTTTCCAC        |

**Table S3. Primers used for multiple sgRNA assembly (for Figure S2).** BsmBI recognition sites are highlighted in green. Overhang sequences are underlined. Overhang sequences for inserting into vectors are highlighted in red.

|    |                                                      |
|----|------------------------------------------------------|
| F1 | ACG <u>CGTCTC</u> <u>AGATA</u> GGCAAGTTTGTGGAATTGGT  |
| R1 | ACG <u>CGTCTC</u> <u>AGGAC</u> TCTTTCCCCTGCACTGTACC  |
| F2 | ACG <u>CGTCTC</u> <u>AGTCC</u> GGCAAGTTTGTGGAATTGGT  |
| R2 | ACG <u>CGTCTC</u> <u>ACGAA</u> TCTTTCCCCTGCACTGTACC  |
| F3 | ACG <u>CGTCTC</u> <u>ATTCCG</u> GGCAAGTTTGTGGAATTGGT |
| R3 | ACG <u>CGTCTC</u> <u>AGCAT</u> TCTTTCCCCTGCACTGTACC  |
| F4 | ACG <u>CGTCTC</u> <u>AATGC</u> GGCAAGTTTGTGGAATTGGT  |
| R4 | ACG <u>CGTCTC</u> <u>AAGCA</u> TCTTTCCCCTGCACTGTACC  |
| F5 | ACG <u>CGTCTC</u> <u>ATGCT</u> GGCAAGTTTGTGGAATTGGT  |
| R5 | ACG <u>CGTCTC</u> <u>ATCCG</u> TCTTTCCCCTGCACTGTACC  |
| F6 | ACG <u>CGTCTC</u> <u>ACGGA</u> GGCAAGTTTGTGGAATTGGT  |
| R6 | ACG <u>CGTCTC</u> <u>ATTGI</u> TCTTTCCCCTGCACTGTACC  |

**Table S4. sgRNAs sequences used in the paper.** Point mutations are labeled in red.

|                   |                      |
|-------------------|----------------------|
| Control sg-1      | GACCGGAACGATCTCGCGTA |
| KDM5A sg-1        | CGTCTTTGAGCCGAGTTGGG |
| KDM5B sg-1        | GATGCCAGTCTGCTCGGCTA |
| KDM5B sg-1 mutant | GATGCCAGTATGCTCGGCTA |
| KDM5C sg-1        | GGTTTACCCCCGAATCCAG  |
| KDM5C sg-1 mutant | GGTTTACCCACCGAATCCAG |
| KDM5C sg-2        | GTCGGACCCCGGCTCCATGG |
| KDM5C sg-2 mutant | GTCGGACCCAGGCTCCATGG |
| KDM5C sg-3        | AGATTCCAATGTAGAACGG  |
| KDM5C sg-3 mutant | AGATTCCCACTGTAGAACGG |
| ARID2 sg-1        | CTAATTTACTGCAAGTCGAG |
| mKDM5B sg-1       | AGACTGGGATCTGTAAGGTG |
| EMX1 sg-1         | GAGTCCGAGCAGAAGAAGAA |
| VEGFA sg-1        | GACCCCTCCACCCCGCCTC  |



**Table S5. Primer sequences for T7 endonuclease assays.**

|                    |                         |
|--------------------|-------------------------|
| EMX1-on-target-F   | CCATCCCCTTCTGTGAATGT    |
| EMX1-on-target-R   | GGAGATTGGAGACACGGAGA    |
| EMX1-off-target-F  | CCTCCTGAGTTTCTCATCTGTGC |
| EMX1-off-target-R  | CATTGCTTGCCCTCTGTCAATG  |
| VEGFA-on-target-F  | TGAGTGACCTGCTTTTGGGG    |
| VEGFA-on-target-R  | GTTTATGGTTTCGGAGGCC     |
| VEGFA-off-target-F | TACCCACCTCCCTATCCTCAA   |
| VEGFA-off-target-R | CCTCGCTATTCAAGTGTTGGTG  |
